# Supplementary figures and images for: The ratio of Mcl-1 and Noxa determines ABT737 resistance in squamous cell carcinoma of the skin
Source: PubMed Central journal article supplement — Cell Death Dis. 2014 Sep 11;5(9):e1412–. doi: 10.1038/cddis.2014.379 (PMC4540197; doi:10.1038/cddis.2014.379), 2014-09-11

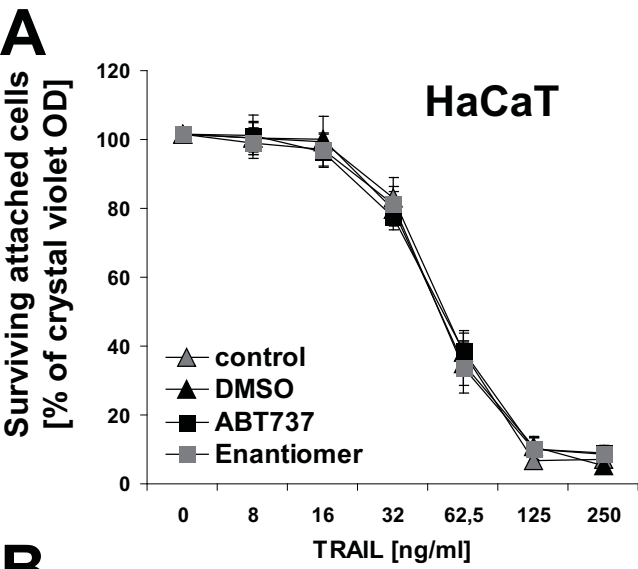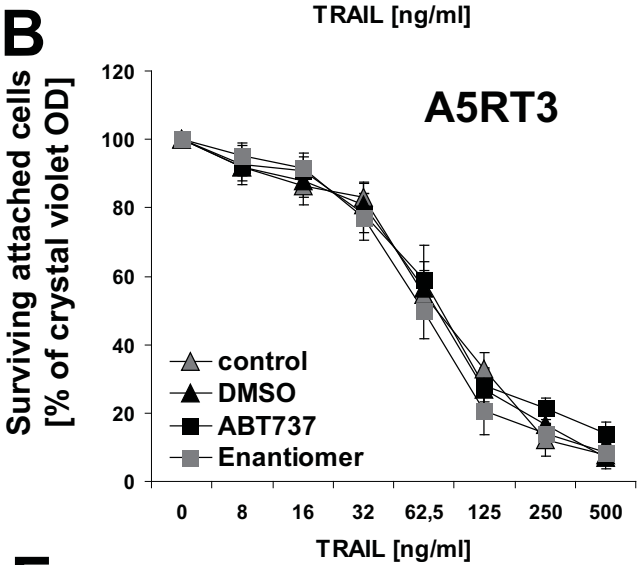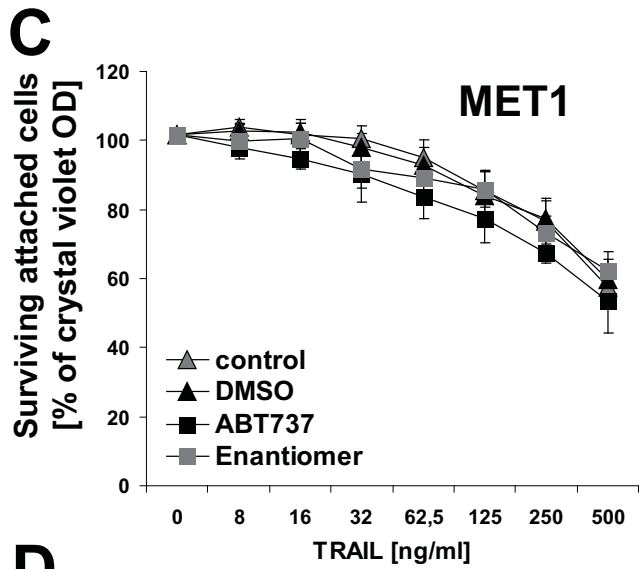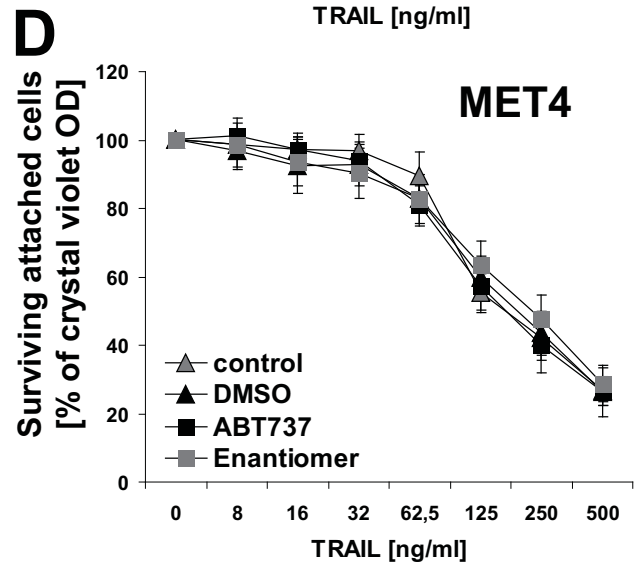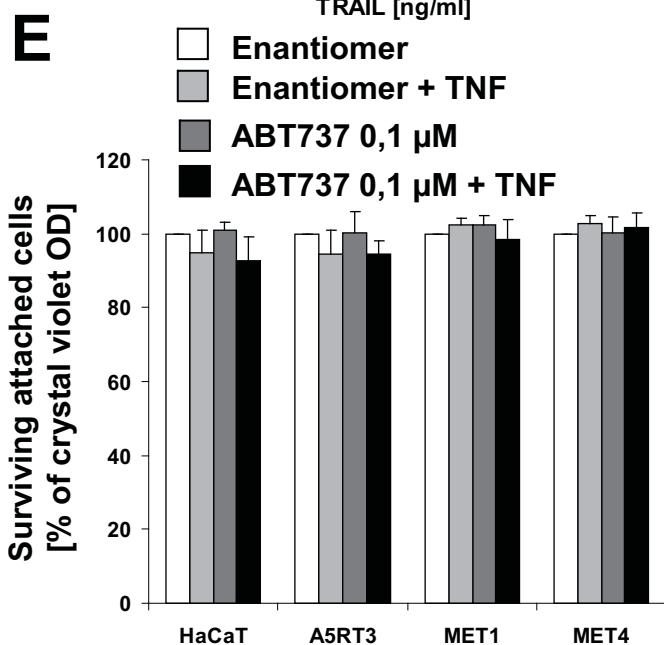

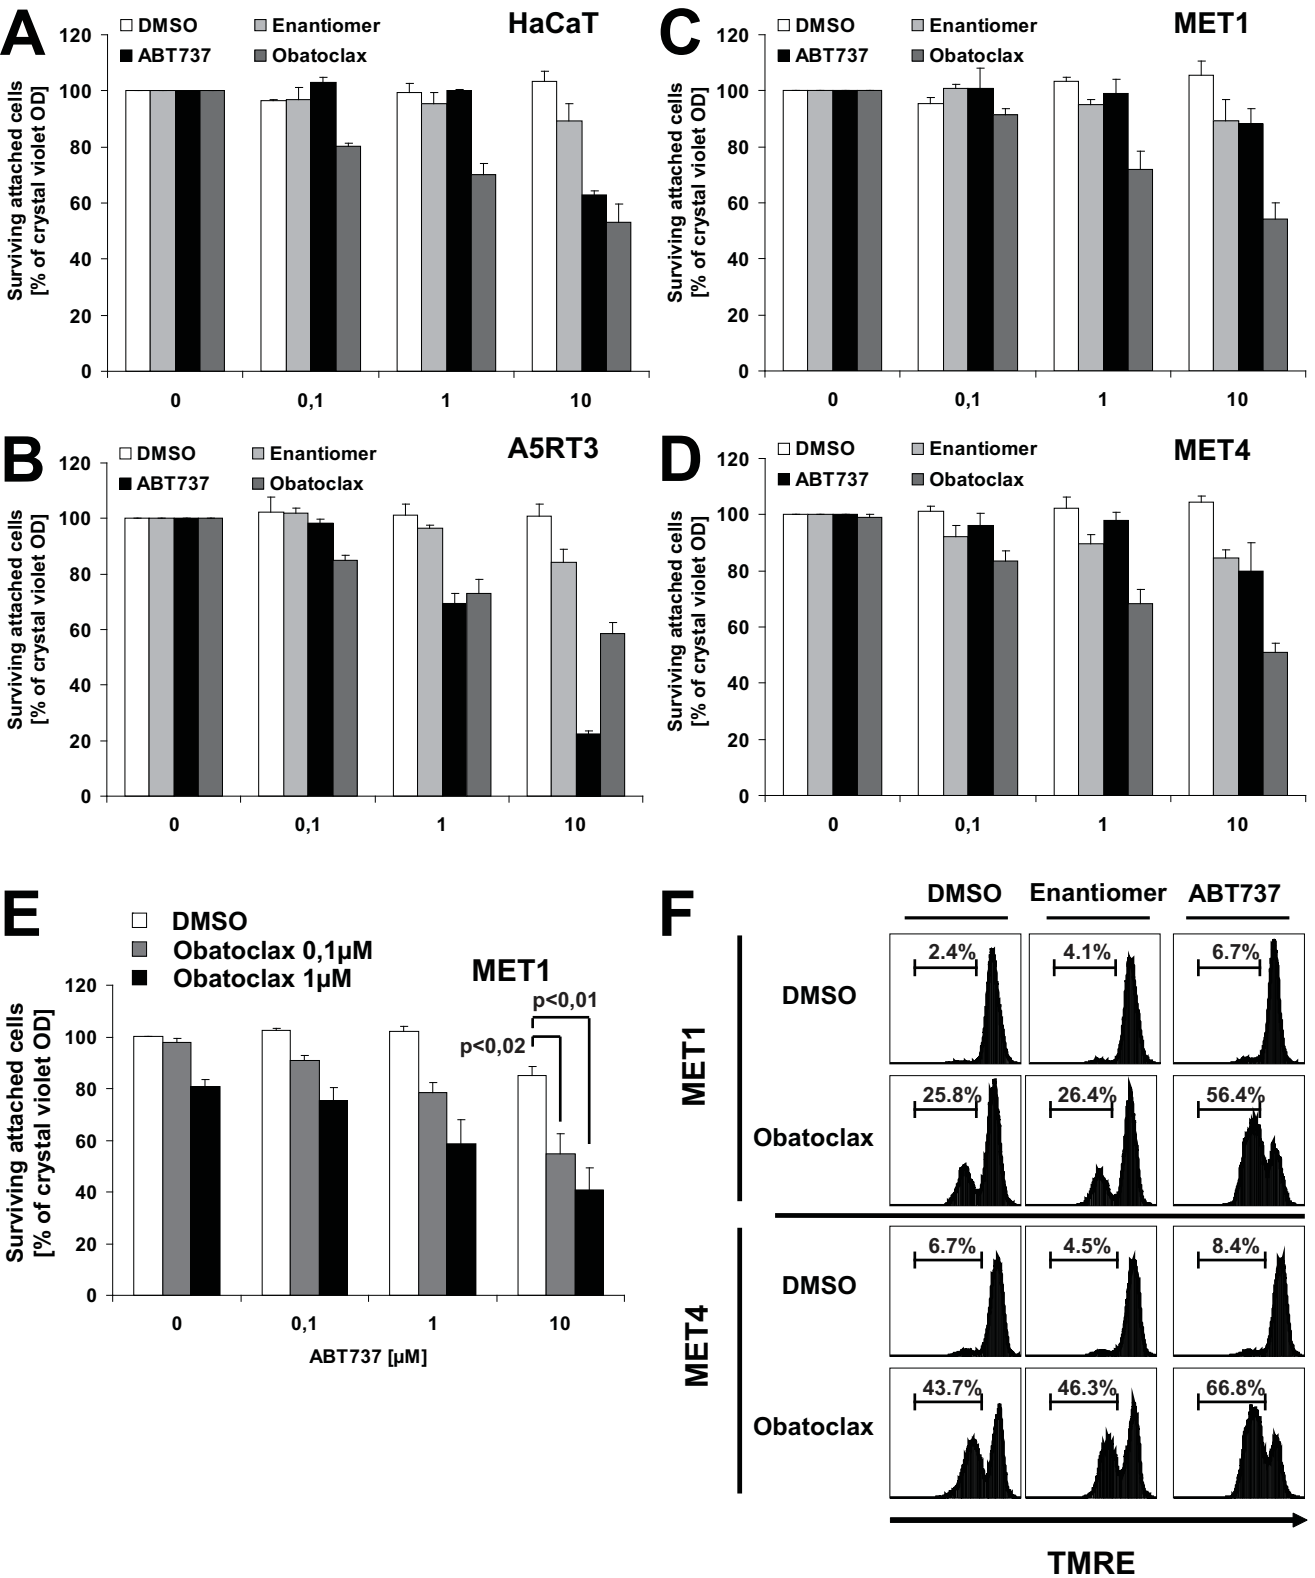

Supplement: cddis2014379x1.pdf [file cddis2014379x1.pdf]
